# Supplementary material
Source: publisher figshare collection journal article supplement (https://acs.figshare.com/ndownloader/files/4646947)
Supplement: Supplementary file 1 [file 4646947]

**Supporting Information**

Title: Coupling hydrologic and infectious disease models to explain regional differences in schistosomiasis transmission in southwestern China

Justin Remais, Song Liang and Robert C. Spear

Summary: Supporting Information contains further details regarding hydrologic model development, the schistosomiasis transmission model, model validation and flow and worm burden model predictions.

5 figures, 1 table, 8 references, 12 pages, 1,800 words

13        **Hydrologic Model Development.** A conceptual rainfall-runoff model (IHACRES;  
14        1, 2) was used to estimate daily channel flow in representative channels in the two sites.  
15        The IHACRES model consists (Figure S1) of a nonlinear rainfall loss module which  
16        converts observed rainfall (mm) at time step  $k$ ,  $r_k$ , into effective or excess rainfall,  $U_k$ , and  
17        a linear module which converts the excess rainfall into observed streamflow (cumecs).  
18

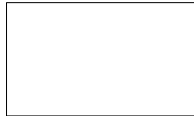

ERROR: invalidaccess  
OFFENDING COMMAND: --filter--

STACK:

/LZWDecode  
-filestream-  
[120 0 0 -147 0 147 ]  
true  
147  
120  
-savelevel-
